# Supplementary material for: An inorganic salt reinforced Zn2+-conducting solid-state electrolyte for ultra-stable Zn metal batteries
Source: Royal Society of Chemistry journal article supplement (doi:10.1039/c9ta07218g), 2019-01-01
Supplement: c9ta07218g7.pdf [file c9ta07218g7.pdf]

# **Inorganic Salt Reinforce Zn<sup>2+</sup>-conducting Solid-state Electrolyte for Ultra-stable Zn Metal Battery**

Qi Han<sup>a,b</sup>, Xiaowei Chi<sup>a,\*</sup>, Yunzhao Liu<sup>a,b</sup>, Liang Wang<sup>c</sup>, Yuexiu Du<sup>a,b</sup>, Yang Ren<sup>d</sup>,  
Yu Liu<sup>a,\*</sup>

<sup>a</sup> Shanghai Institute of Ceramics, Chinese Academy of Sciences, Shanghai 200050, P.R. China

<sup>b</sup> University of Chinese Academy of Sciences, Beijing 100049, P.R. China

<sup>c</sup> School of Materials Science and Engineering, Beijing Institute of Technology, Beijing 100081,  
P.R. China

<sup>d</sup> X-ray Science Division, Argonne National Laboratory, Argonne IL 60439, USA

Corresponding Authors:

\*Email: [xwchi@mail.sic.ac.cn](mailto:xwchi@mail.sic.ac.cn); [yuliu@mail.sic.ac.cn](mailto:yuliu@mail.sic.ac.cn)

**Table S1.** Component (gelatin, salt, and water) content of GSE-x (x=0, 1.0, 1.5, 2.0, 2.5, 3.0, and 3.5)

| <b>Sample</b> | <b>Gelatin content<br/>[w/w%]</b> | <b>Salt content<br/>[w/w%]</b> | <b>Water content<br/>[w/w%]</b> |
|---------------|-----------------------------------|--------------------------------|---------------------------------|
| GSE-0.0       | 9.09                              | 12.75                          | 78.16                           |
| GSE-1.0       | 5.96                              | 14.85                          | 79.19                           |
| GSE-1.5       | 9.85                              | 20.98                          | 69.17                           |
| GSE-2.0       | 15.71                             | 30.25                          | 54.04                           |
| GSE-2.5       | 18.90                             | 35.75                          | 45.35                           |
| GSE-3.0       | 20.30                             | 34.71                          | 44.98                           |
| GSE-3.5       | 20.83                             | 34.98                          | 44.19                           |

**Table S2.** Cycling performance reported in Fig. 2e.

| <b>Data Point</b> | <b>Electrolyte</b> | <b>Zinc anode</b>    | <b>Current density<br/>(mA cm<sup>-2</sup>)</b> | <b>Cumulative capacity<br/>plated (mAh cm<sup>-2</sup>)</b> | <b>Ref.</b>      |
|-------------------|--------------------|----------------------|-------------------------------------------------|-------------------------------------------------------------|------------------|
| 1                 | PVA                | Zn foil              | 0.1                                             | 80                                                          | 12               |
| 2                 | Alginate/PAAM      | Electroplated zinc   | 0.2                                             | 16                                                          | 15               |
| 3                 | Silica             | Zn foil              | 0.2                                             | 300                                                         | 17               |
| 4                 | PEO                | Zinc powder          | 0.1                                             | 17                                                          | 19               |
| 5                 | PEO-PPO-PEO        | Zinc powder          | 0.1                                             | 22                                                          | 19               |
| 6                 | Gelatin            | Zn foil              | 0.2                                             | 160                                                         | 20               |
| 7                 | Gelatin            | Zn/SS                | 2                                               | 600                                                         | 28               |
| 8                 | Liquid             | C@Zn                 | 2.5                                             | 600                                                         | 29               |
| 9                 | Liquid             | TiO <sub>2</sub> @Zn | 1                                               | 150                                                         | 30               |
| 10                | Liquid             | PA@Zn                | 0.5                                             | 4000                                                        | 31               |
| <b>This work</b>  | <b>GSE-2.5</b>     | <b>Zn foil</b>       | <b>5</b>                                        | <b>2000</b>                                                 | <b>This work</b> |

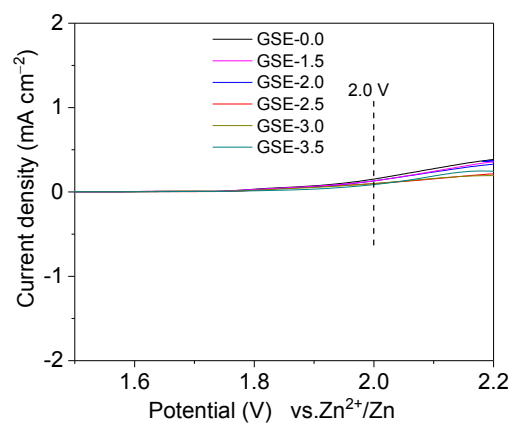

**Figure S1.** The LSV curves of Zn/GSE-x/SS (SS means stainless steel; x=0.0, 1.5, 2.0, 2.5, 3.0, 3.5).

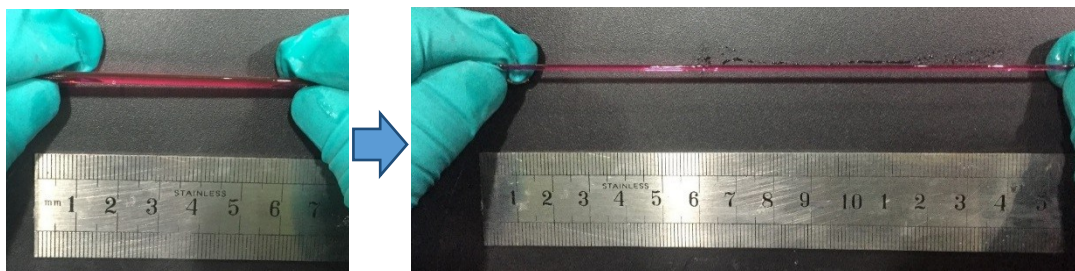

Figure S2. Relaxed (left) and elongated (right) state of the GSE-3.5

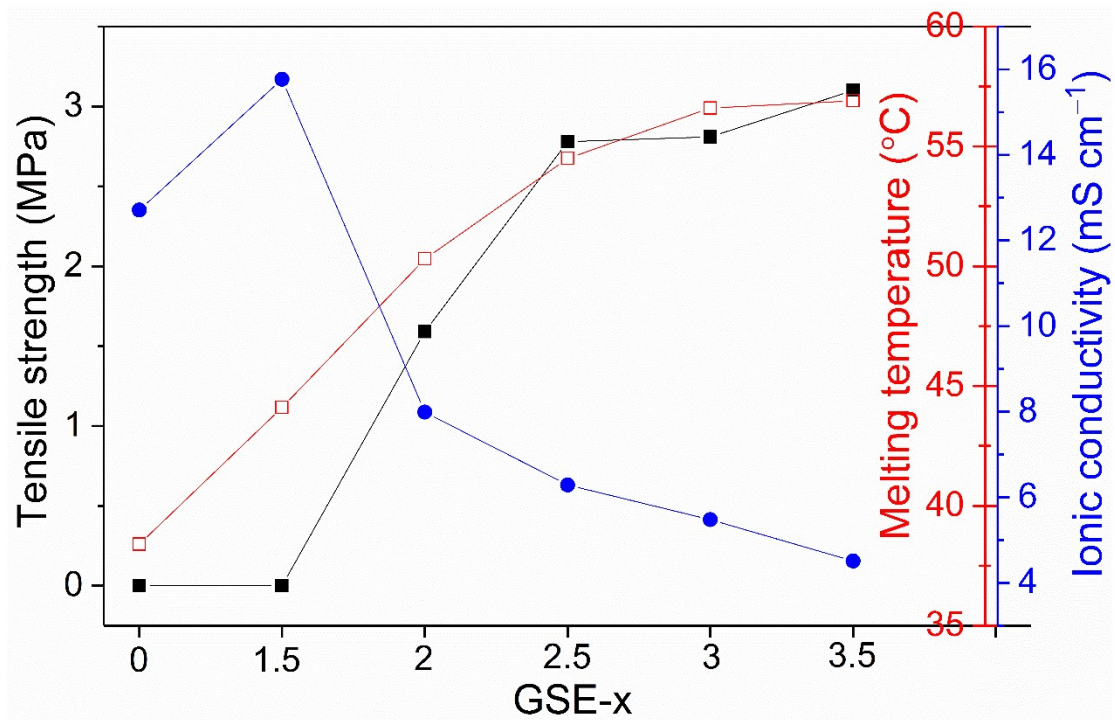

**Figure S3.** Comparison of properties (tensile strength, melting point, and ionic conductivity) of GSE-x ( $x=0, 1.0, 1.5, 2.0, 2.5, 3.0,$  and  $3.5$ ).

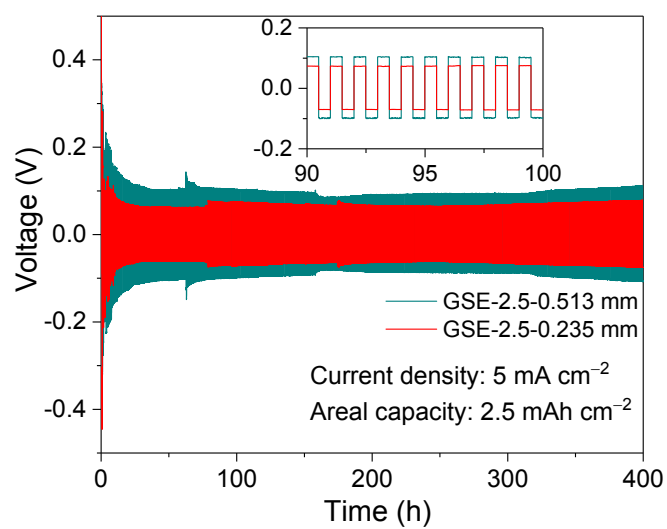

**Figure S4.** Galvanostatic cycling of Zn/GSE-2.5-0.235 mm/Zn, Zn/GSE-2.5-0.513 mm/Zn solid-state symmetric cells at current density of 5 mA cm<sup>-2</sup>.

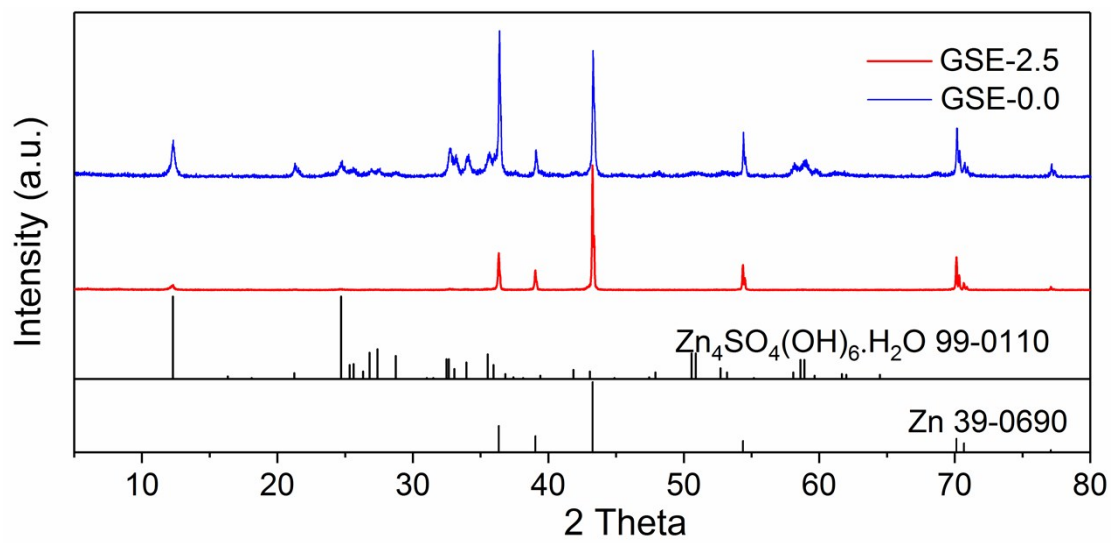

**Figure S5.** XRD patterns of Zn electrodes in the insets of Figure 2e and 2f.



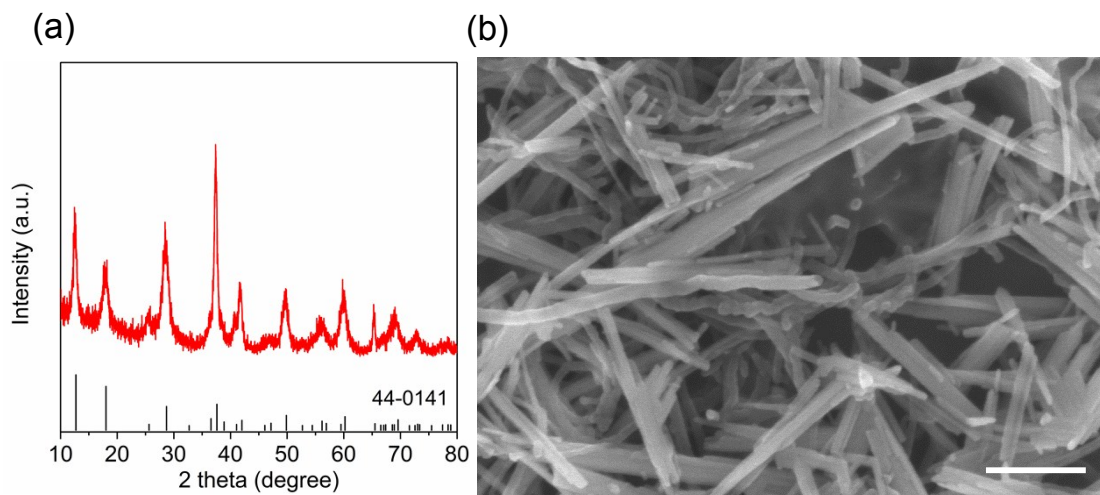

**Figure S6.** (a) XRD pattern; (b) SEM image of  $\alpha$ -MnO<sub>2</sub>/CNT composite. Scale bar: 200 nm

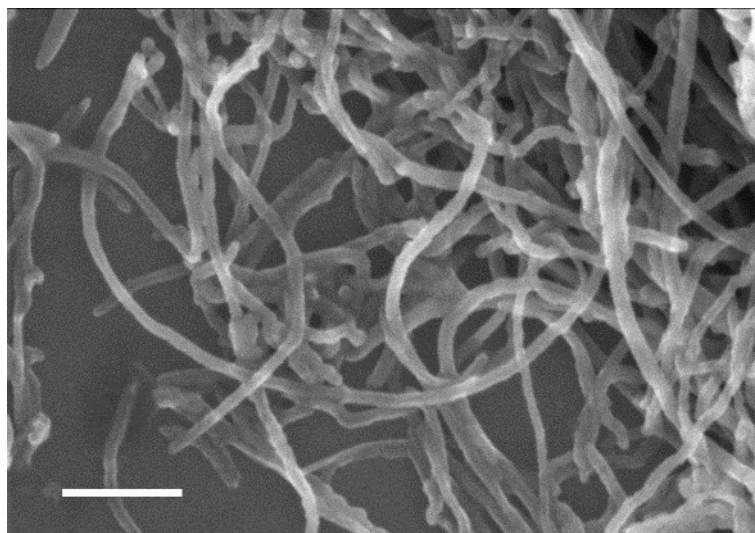

**Figure S7.** SEM image of acid-treated CNT. Scale bar: 200 nm

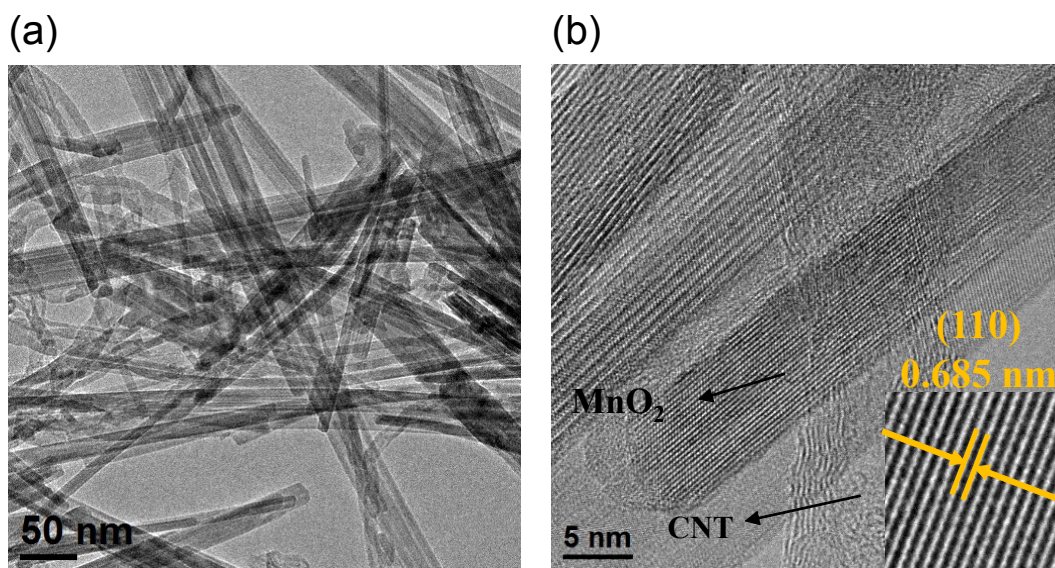

Figure S8. (a) TEM and (b) HRTEM images of  $\alpha$ -MnO<sub>2</sub>/CNT composite.

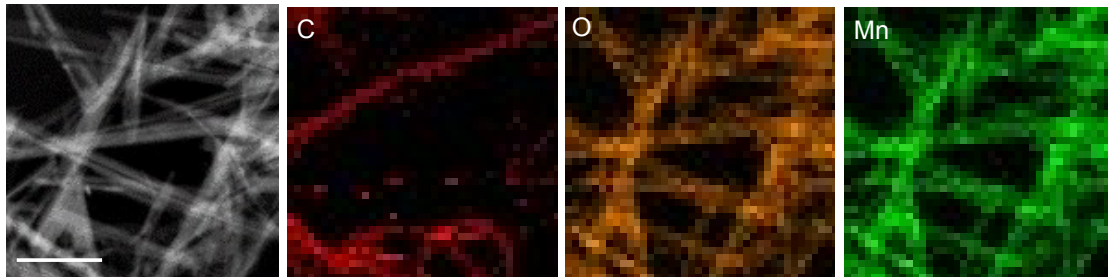

**Figure S9.** HAADF-STEM image and corresponding EDX mapping image of  $\text{MnO}_2/\text{CNT}$  composite. Scale bar: 200 nm

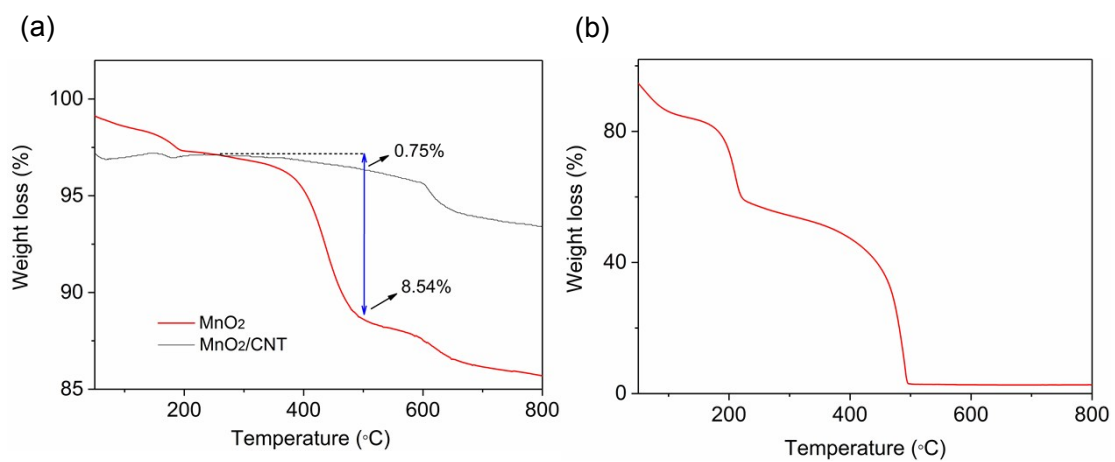

**Figure S10.** TG curves of (a) MnO<sub>2</sub>, MnO<sub>2</sub>/CNT and (b) acid-treated CNT

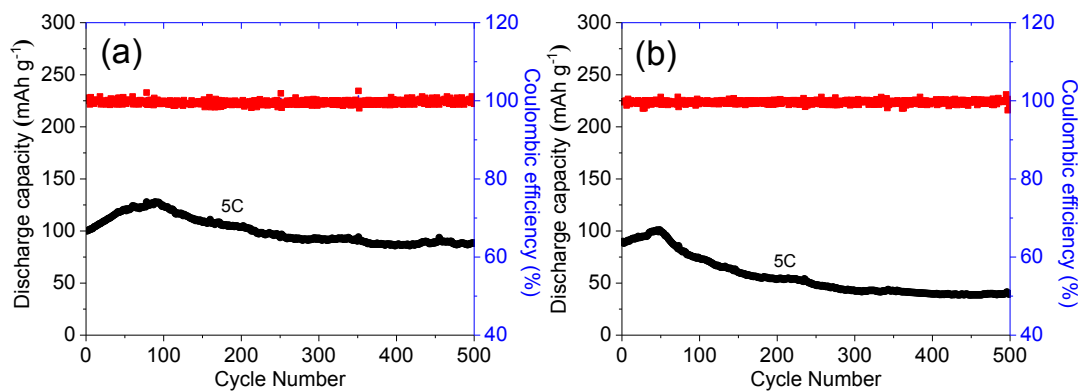

**Figure 11.** Cycle performance of (a) Zn/GSE-0/MnO<sub>2</sub>, (b) Zn/GSE-3.5/MnO<sub>2</sub> at 5C (1C=308 mA g<sup>-1</sup>)

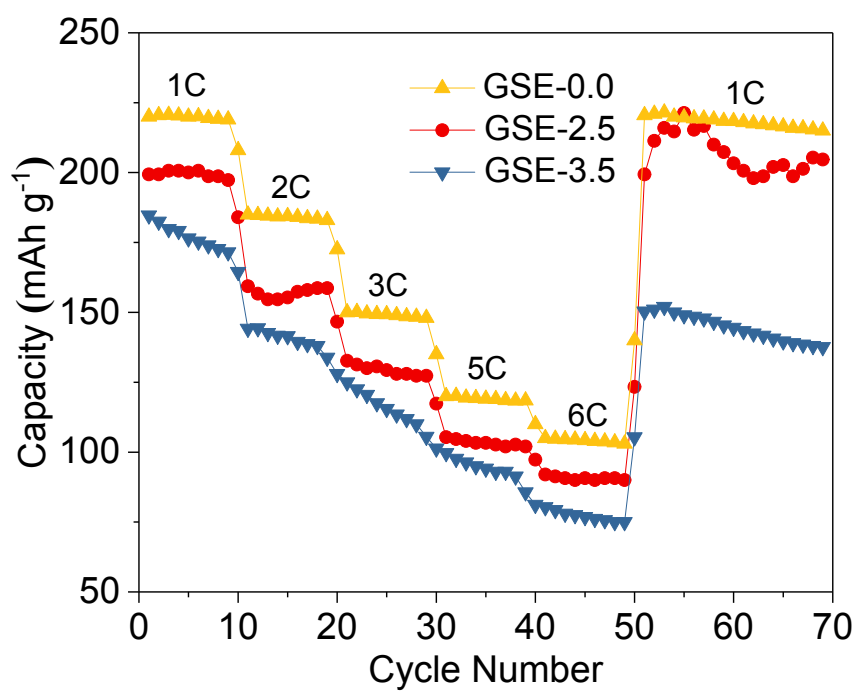

**Figure S12.** Rate performance of the Zn/GSE-0/MnO<sub>2</sub>, Zn/GSE-2.5/MnO<sub>2</sub>, and Zn/GSE-3.5/MnO<sub>2</sub> batteries at various rates (1C=308 mA g<sup>-1</sup>)

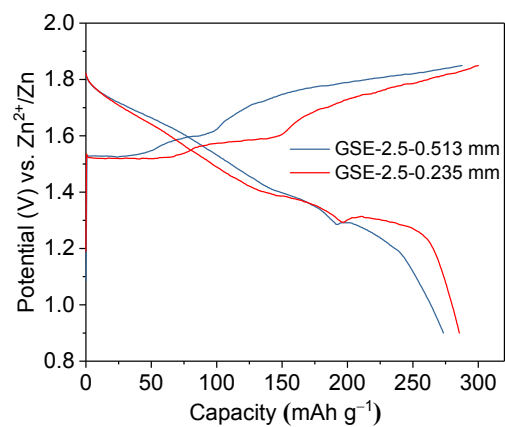

**Figure S13.** Charge-discharge voltage profiles of Zn/GSE-2.5-0.235 mm/MnO<sub>2</sub> and Zn/GSE-2.5-0.513 mm/MnO<sub>2</sub> batteries at the second cycle.



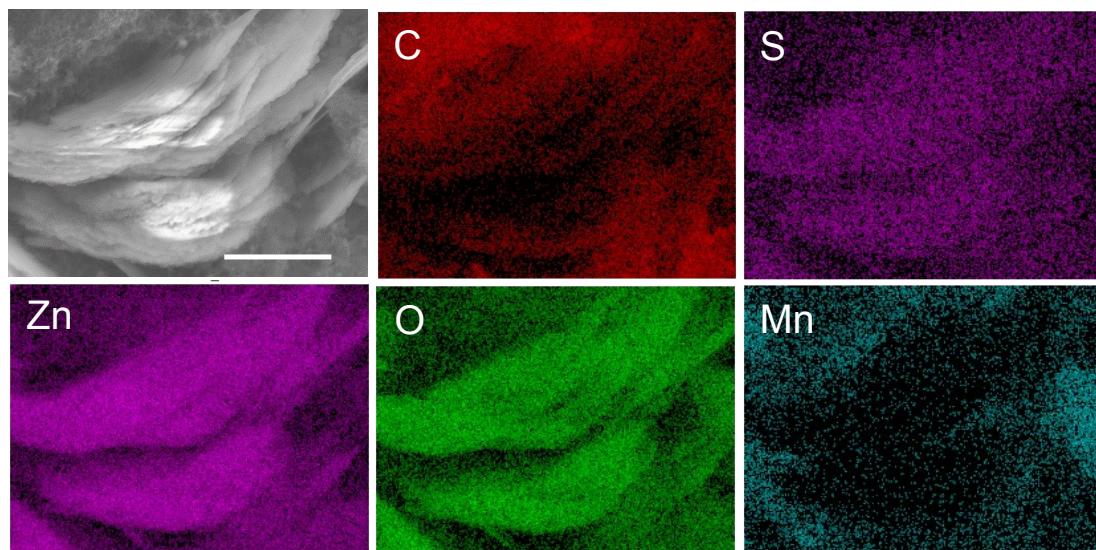

**Figure S14.** SEM at high magnification of the flask-like products in the fully discharged sample at state 3 in Figure 4a and the corresponding EDS mapping results. Scale bar, 5  $\mu\text{m}$

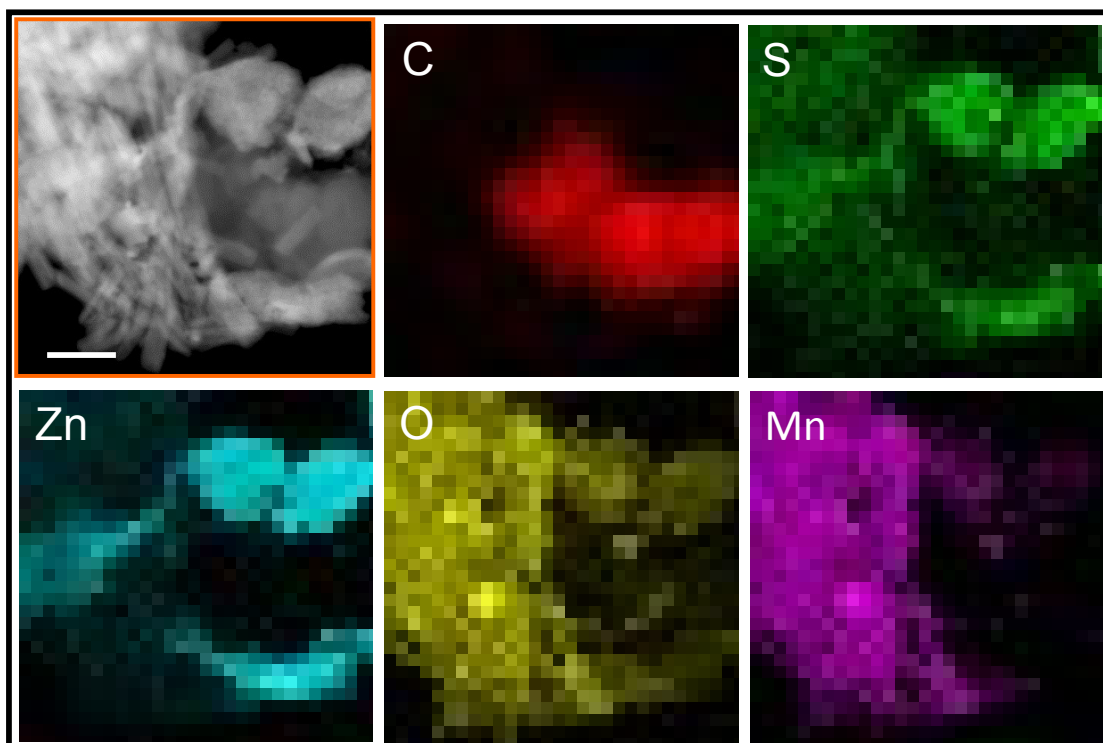

**Figure S15.** HAADF-STEM image and corresponding EDX mapping of the particle-shape products in the fully discharged sample at state 3 in Fig. 4a. Scale bar, 100 nm

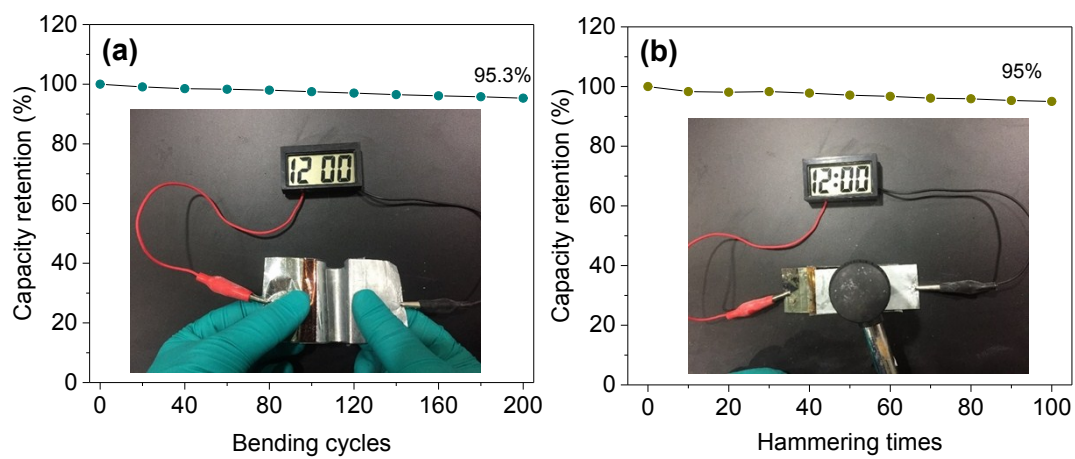

**Figure S16.** Electrochemical performance of the solid-state Zn/GSE-2.5/MnO<sub>2</sub> ZMBs under (a) being bent; (b) being hammered.
